# Supplementary material for: Fatal Epileptic Seizures in Mice Having Compromised Glutathione and Ascorbic Acid Biosynthesis
Source: MDPI journal article supplement (doi:10.3390/antiox12020448), 2023-02-10
Supplement: s1 [file s1]

# **Fatal Epileptic Seizures in Mice Having Compromised Glutathione and Ascorbic Acid Biosynthesis**

**Ying Chen<sup>1,2#</sup>, Katherine D. Holland<sup>3,4</sup>, Howard G. Shertzer<sup>1</sup>, Daniel W. Nebert<sup>1,5</sup> and Timothy P. Dalton<sup>1</sup>**

<sup>1</sup>Department of Environmental and Public Health Sciences and Center for Environmental Genetics, University of Cincinnati College of Medicine, Cincinnati, OH, 45267, USA.

<sup>2</sup>Department of Environmental Health Sciences, Yale School of Public Health, Yale University, New Haven, CT 06520, USA.

<sup>3</sup>Division of Neurology, Cincinnati Children's Hospital Medical Center, Cincinnati, OH, 45229, USA.

<sup>4</sup>Department of Pediatrics, University of Cincinnati College of Medicine, Cincinnati, OH, 45267, USA.

<sup>5</sup>Departments of Pediatrics and Molecular & Developmental Biology, Cincinnati Children's Research Center, Cincinnati, OH, 45229, USA.

<sup>#</sup>Corresponding Author: Ying Chen, PhD, Department of Environmental Health Sciences, Yale School of Public Health, 60 College Street, Rm. 521, New Haven, CT 06520-8034. Tel: 203.785.4694; Fax: 203.724.6023; Email: ying.chen@yale.edu.

## Materials and Methods

### *Genotyping by polymerase chain reaction (PCR)*

Genotypes of experimental mice were determined by PCR analysis of genomic DNA extracted from pup ear punches at PND12. Briefly, a 2 mm ear punch was lysed in 100  $\mu$ l DirectPCR Lysis Reagent (Viagen Biotech, Los Angeles, CA) containing proteinase K (Sigma-Aldrich, St. Louis, MO) at 55°C overnight and denatured at 85°C for 45 min. 1  $\mu$ l of crude DNA was used in two separate multiplex PCR reactions to detect *Gclm* and *Gulo* alleles, respectively, as described previously [1; 2].

### *Reverse transcription and real-time quantitative PCR (Q-PCR)*

Total RNA was isolated from frozen liver pieces using RNeasy Plus Kit (Qiagen, Germantown, MD) according to manufacturer's protocol. cDNA was synthesized using iScript™ cDNA Synthesis Kit (BioRad, Hercules, CA) according to manufacturer's instructions using total RNA (1  $\mu$ g from neocortex and 0.5  $\mu$ g from hippocampus) in a 20  $\mu$ l reaction volume. Q-PCR reaction mixtures contained 1  $\mu$ l cDNA, 1x SYBR Green Supermix (BioRad), and 0.15  $\mu$ M gene-specific primer sets in a total volume of 10  $\mu$ l. Reactions were run using the CFX96 Touch Detection System (BioRad, Hercules, CA). Expression of housekeeping genes (*Rplp0* and *18s*) were used for normalization of  $C_T$  data using the delta- $C_T$  method ( $dC_T = C_T(\text{gene of interest}) - C_T(\text{average of housekeeping genes})$ ), such that a high  $dC_T$  value was reflective of a low mRNA expression. Sequences of primers used for Q-PCR were 5'-GTAACCCGTTGAACCCCAT (forward) and 5'-CCATCCAATCGGTAGTAGCG (reverse) for *18s*, 5'-TGAGATTCGGGATATGCTGTTGG (forward) and 5'-CGGGTCCTAGACCAGTGTTCT (reverse) for *Rplp0*, 5'-ACCGGGAACCTGCTCAACT (forward) and 5'-GCATGGGACATGGTGCATTCC (reverse) for *Gclm*, 5'-GGCGATGTTCTTGAGACTCTGC (forward) and 5'-TTCCTTCGATCATGTAACCTCCATA (reverse) for *Gclc*, 5'-CTTGCGTGAATGTTGGATGTG (forward) and 5'-GCATCCCTTTTCTGCTTGATG (reverse) for *Gsr*, 5'-ATGAAAGTCCAGCCCAAGG (forward) and 5'-GGTCCTTCTCTATCACCTGGG (reverse) for *Gpx4*, 5'-CCGGCAGCAGAACAAGAAAGTGAA (forward) and 5'-AGGGCCAGGCCATGCTTGT (reverse) for *Gulo*, 5'-TTCGGCTTGCTCCATTCTCCTGAT (forward) and 5'-ATCAGTTCGAGCCTGGAAGCCATA (reverse) for *Slc23a1*, and 5'-GGACGGCATAACAAGTTCCAGCTTT (forward) and 5'-CCCACTGAAATGGGTATGGAACCT (reverse) for *Slc23a2*.

## Supplemental data

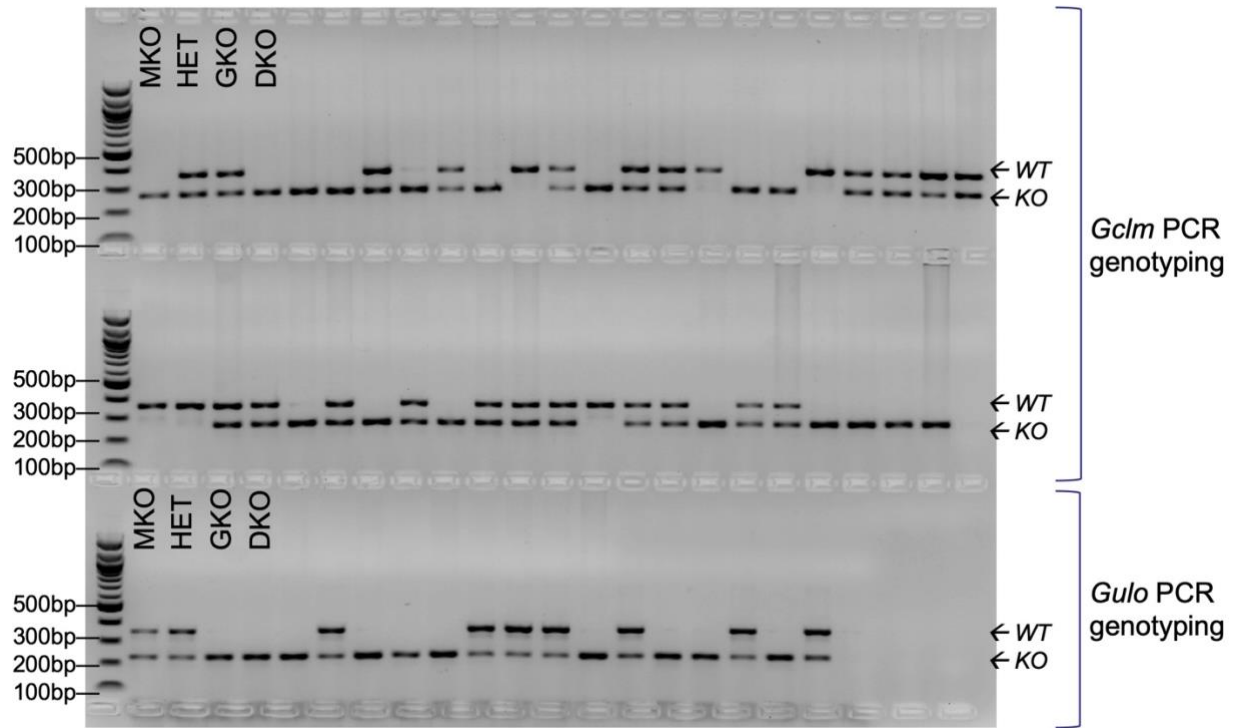

**Figure S1. Genotyping of experimental mice by PCR.** DNA electrophoresis of PCR genotyping using genomic DNA extracted from ear punches at PND12. *Gclm* WT and KO alleles yielded a 350 bp and 250 bp PCR products, respectively. *Gulo* WT and KO alleles yielded a 330 bp and 210 bp PCR products, respectively. Four genotype groups were *Gclm*<sup>WT/KO</sup>/*Gulo*<sup>WT/KO</sup> (HET), *Gclm*<sup>KO/KO</sup>/*Gulo*<sup>WT/KO</sup> (MKO), *Gclm*<sup>WT/KO</sup>/*Gulo*<sup>KO/KO</sup> (GKO) and *Gclm*<sup>KO/KO</sup>/*Gulo*<sup>KO/KO</sup> (DKO).

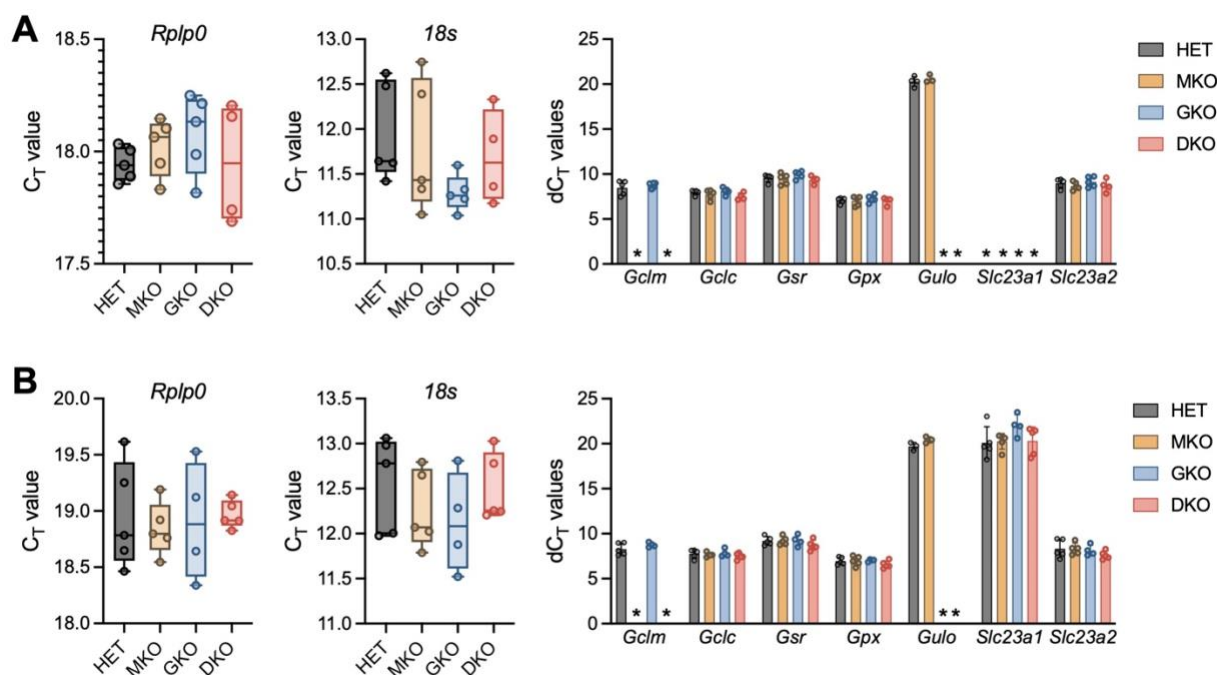

**Figure S2. Q-PCR analysis of gene expression in brain tissues.** Examined genes were GSH metabolizing enzymes (*Gclm*, *Gclc*, *Gsr*, and *Gpx*), AA biosynthesis enzyme (*Gulo*), and AA transporters (*Slc23a1* and *Slc23a2*) in neocortex (A) and hippocampus (B). Expressions of housekeeping genes *Rplp0* and *18s* were used for normalization of  $C_T$  data. Relative mRNA abundance of individual gene was reported as the d $C_T$  value wherein a high d $C_T$  value was reflective of a low mRNA expression. Multiple group comparisons were performed by one-way ANOVA followed by *post-hoc* Bonferroni test for multiple comparisons using the Graphpad Prism software (San Diego, CA).  $P < 0.05$  was considered significant. \*mRNA of the gene was not detectable in the specified genotype group. Our data showed that: (i) As expected, the expression of *Gclm* gene was not detectable in MKO or DKO mice; likewise, the expression of *Gulo* gene was not detectable in GKO or DKO mice. (ii) The *Gulo* and *Slc23a1* genes were expressed at minimal levels in these brain tissues. (iii) There was no difference in the expression of these genes in the two brain regions among four genotype groups.

## References

- [1] Y. Yang, M.Z. Dieter, Y. Chen, H.G. Shertzer, D.W. Nebert, and T.P. Dalton, Initial characterization of the glutamate-cysteine ligase modifier subunit Gclm(-/-) knockout mouse. Novel model system for a severely compromised oxidative stress response. *Journal of Biological Chemistry* 277 (2002) 49446-52.
- [2] N. Maeda, H. Hagihara, Y. Nakata, S. Hiller, J. Wilder, and R. Reddick, Aortic wall damage in mice unable to synthesize ascorbic acid. *Proc Natl Acad Sci U S A* 97 (2000) 841-6.
